# Supplementary material
Source: MDPI journal article supplement (https://www.mdpi.com/1424-2818/7/4/360)
Supplement: s1 [file s1]

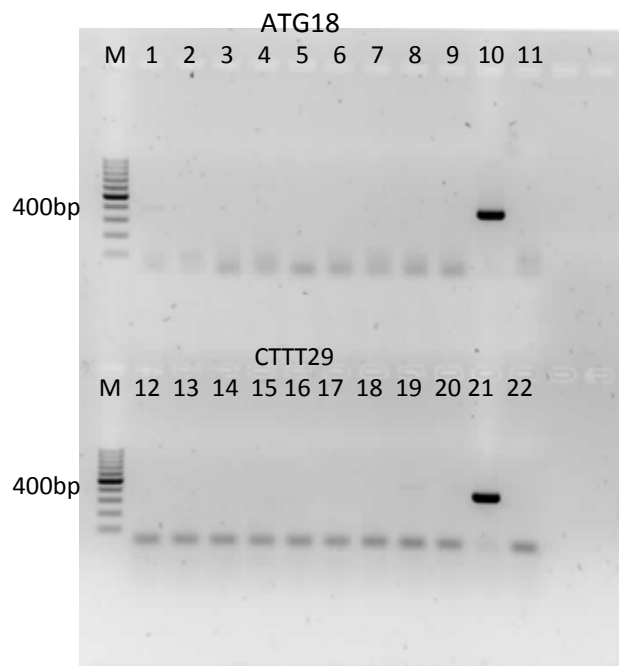

|    |                          |
|----|--------------------------|
| 1  | <i>T. lutea</i> (26)     |
| 2  | <i>T. koningii</i> (28)  |
| 3  | <i>T. reesei</i> (112)   |
| 4  | <i>P. indica</i> (23)    |
| 5  | <i>Tricholomata</i> (96) |
| 6  | <i>Mortierella</i> (25)  |
| 7  | <i>Neonectria</i> (97)   |
| 8  | <i>Eucasphaeria</i> (98) |
| 9  | <i>Penicillium</i> (76)  |
| 10 | <i>T. virens</i> (1)     |
| 11 | NK                       |
| 12 | <i>T. lutea</i> (26)     |
| 13 | <i>T. koningii</i> (28)  |
| 14 | <i>T. reesei</i> (112)   |
| 15 | <i>P. indica</i> (23)    |
| 16 | <i>Tricholomata</i> (96) |
| 17 | <i>Mortierella</i> (25)  |
| 18 | <i>Neonectria</i> (97)   |
| 19 | <i>Eucasphaeria</i> (98) |
| 20 | <i>Penicillium</i> (76)  |
| 21 | <i>T. virens</i> (1)     |
| 22 | NK                       |

CA39 repeated and pasted to the former image

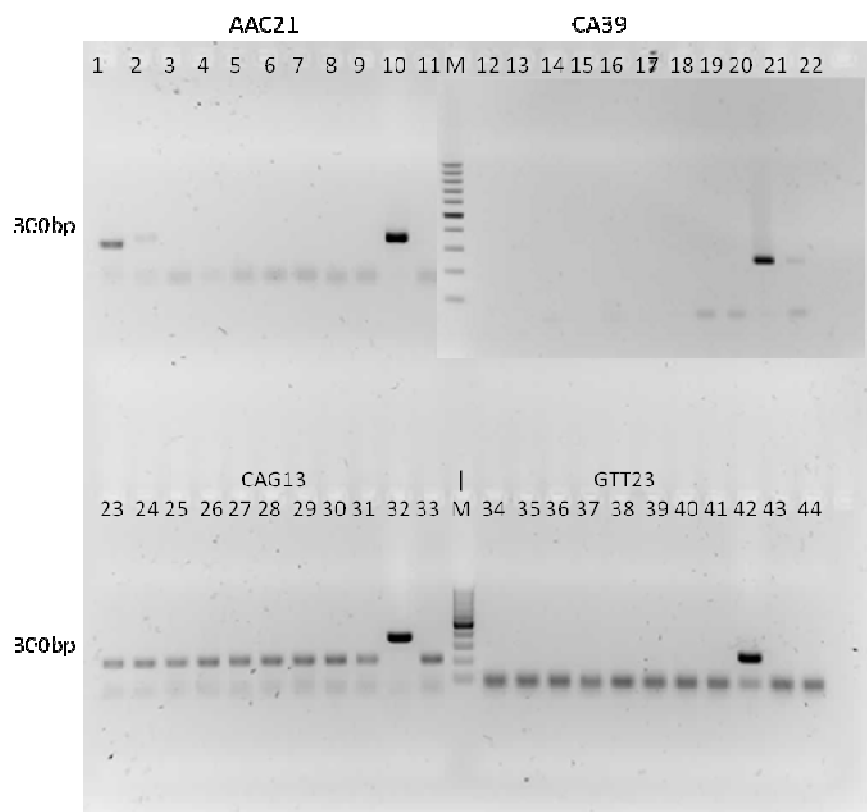

|    |                   |
|----|-------------------|
| 1  | T. lutea (26)     |
| 2  | T. koningii (28)  |
| 3  | T. reesei (112)   |
| 4  | P. indica (23)    |
| 5  | Tricholomata (96) |
| 6  | Mortierella (25)  |
| 7  | Neonectria (97)   |
| 8  | Eucasphaeria (98) |
| 9  | Penicillium (76)  |
| 10 | T. virens (1)     |
| 11 | NK                |
| 12 | T. lutea (26)     |
| 13 | T. koningii (28)  |
| 14 | T. reesei (112)   |
| 15 | P. indica (23)    |
| 16 | Tricholomata (96) |
| 17 | Mortierella (25)  |
| 18 | Neonectria (97)   |
| 19 | Eucasphaeria (98) |
| 20 | Penicillium (76)  |
| 21 | T. virens (1)     |
| 22 | NK                |
| 23 | T. lutea (26)     |
| 24 | T. koningii (28)  |
| 25 | T. reesei (112)   |
| 26 | P. indica (23)    |
| 27 | Tricholomata (96) |
| 28 | Mortierella (25)  |
| 29 | Neonectria (97)   |
| 30 | Eucasphaeria (98) |
| 31 | Penicillium (76)  |
| 32 | T. virens (1)     |
| 33 | NK                |
| 34 | T. lutea (26)     |
| 35 | T. koningii (28)  |
| 36 | T. reesei (112)   |
| 37 | P. indica (23)    |
| 38 | Tricholomata (96) |
| 39 | Mortierella (25)  |
| 40 | Neonectria (97)   |
| 41 | Eucasphaeria (98) |
| 42 | T. virens (1)     |
| 43 | NK                |
| 44 | Penicillium (76)  |

Upper CAG13 image confused with other primer!

CAG13 repeated

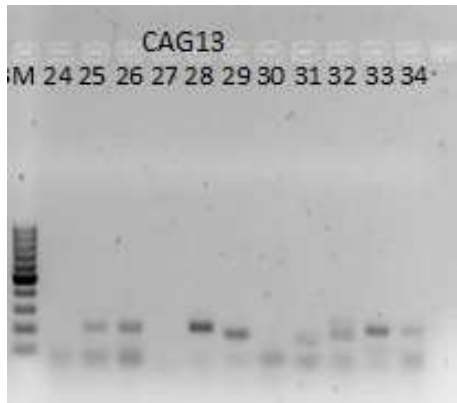

|    |                   |
|----|-------------------|
| 24 | T. lutea (26)     |
| 25 | T. koningii (28)  |
| 26 | T. reesei (112)   |
| 27 | P. indica (23)    |
| 28 | Tricholomata (96) |
| 29 | Mortierella (25)  |
| 30 | Neonectria (97)   |
| 31 | Eucasphaeria (98) |
| 32 | Penicillium (76)  |
| 33 | T. virens (1)     |
| 34 | NK                |

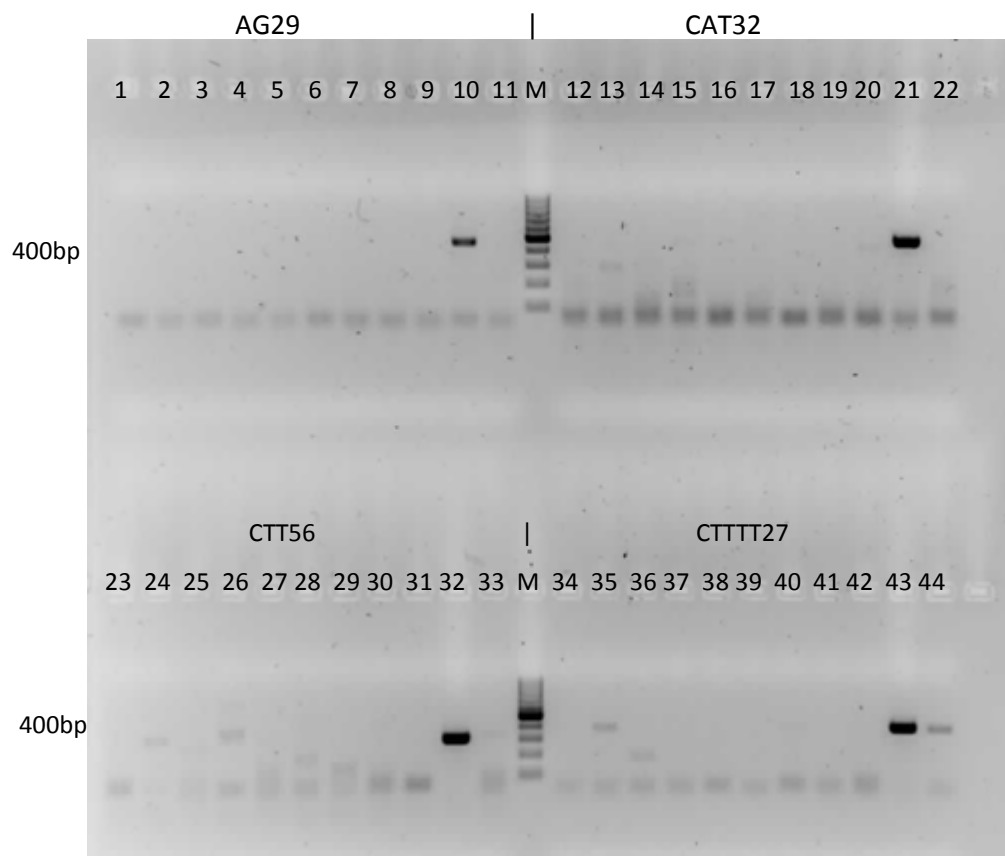

1 T.lutea (26)

|    |                   |
|----|-------------------|
| 2  | T. koningii (28)  |
| 3  | T. reesei (112)   |
| 4  | P. indica (23)    |
| 5  | Tricholomata (96) |
| 6  | Mortierella (25)  |
| 7  | Neonectria (97)   |
| 8  | Eucasphaeria (98) |
| 9  | Penicillium (76)  |
| 10 | T. virens (1)     |
| 11 | NK                |
| 12 | T. lutea (26)     |
| 13 | T. koningii (28)  |
| 14 | T. reesei (112)   |
| 15 | P. indica (23)    |
| 16 | Tricholomata (96) |
| 17 | Mortierella (25)  |
| 18 | Neonectria (97)   |
| 19 | Eucasphaeria (98) |
| 20 | Penicillium (76)  |
| 21 | T. virens (1)     |
| 22 | NK                |
| 23 | T. lutea (26)     |
| 24 | T. koningii (28)  |
| 25 | T. reesei (112)   |
| 26 | P. indica (23)    |
| 27 | Tricholomata (96) |
| 28 | Mortierella (25)  |
| 29 | Neonectria (97)   |
| 30 | Eucasphaeria (98) |
| 31 | Penicillium (76)  |
| 32 | T. virens (1)     |
| 33 | NK                |
| 34 | T. lutea (26)     |
| 35 | T. koningii (28)  |
| 36 | T. reesei (112)   |
| 37 | P. indica (23)    |
| 38 | Tricholomata (96) |
| 39 | Mortierella (25)  |
| 40 | Neonectria (97)   |
| 41 | Eucasphaeria (98) |
| 42 | Penicillium (76)  |
| 43 | T. virens (1)     |
| 44 | NK                |

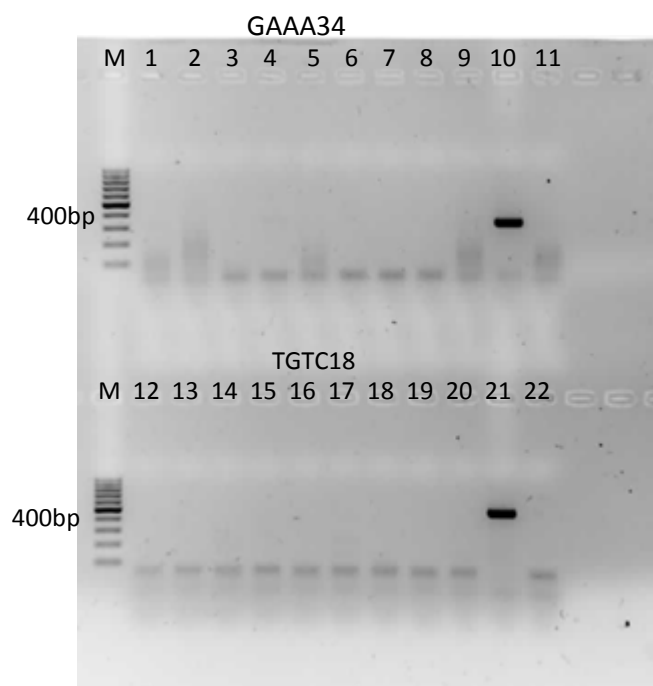

|    |                          |
|----|--------------------------|
| 1  | <i>T. lutea</i> (26)     |
| 2  | <i>T. koningii</i> (28)  |
| 3  | <i>T. reesei</i> (112)   |
| 4  | <i>P. indica</i> (23)    |
| 5  | <i>Tricholomata</i> (96) |
| 6  | <i>Mortierella</i> (25)  |
| 7  | <i>Neonectria</i> (97)   |
| 8  | <i>Eucasphaeria</i> (98) |
| 9  | <i>Penicillium</i> (76)  |
| 10 | <i>T. virens</i> (1)     |
| 11 | NK                       |
| 12 | <i>T. lutea</i> (26)     |
| 13 | <i>T. koningii</i> (28)  |
| 14 | <i>T. reesei</i> (112)   |
| 15 | <i>P. indica</i> (23)    |
| 16 | <i>Tricholomata</i> (96) |
| 17 | <i>Mortierella</i> (25)  |
| 18 | <i>Neonectria</i> (97)   |
| 19 | <i>Eucasphaeria</i> (98) |
| 20 | <i>Penicillium</i> (76)  |
| 21 | <i>T. virens</i> (1)     |
| 22 | NK                       |
