# Supplementary material
Source: MDPI journal article supplement (https://www.mdpi.com/1424-2818/7/4/360)
Supplement: s1 [file s1]

Multiplex PCR by Capillary Gel Electrophoresis

Fragment Analysis T.virens, Primer CTTTT27/GAAA34/CAG13

Italy (Multiplex-PCR)

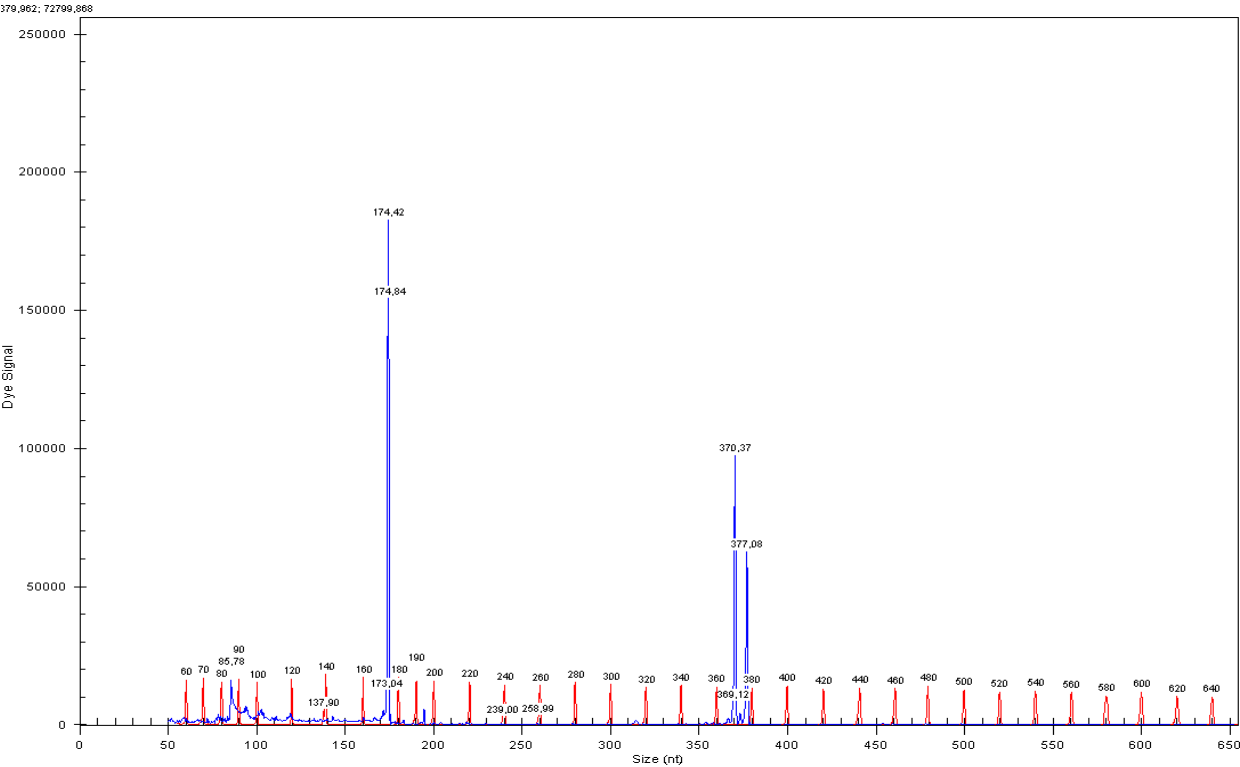

Fragment Sizes 174bp, 370bp, 377bp

Western Australia (Multiplex-PCR)

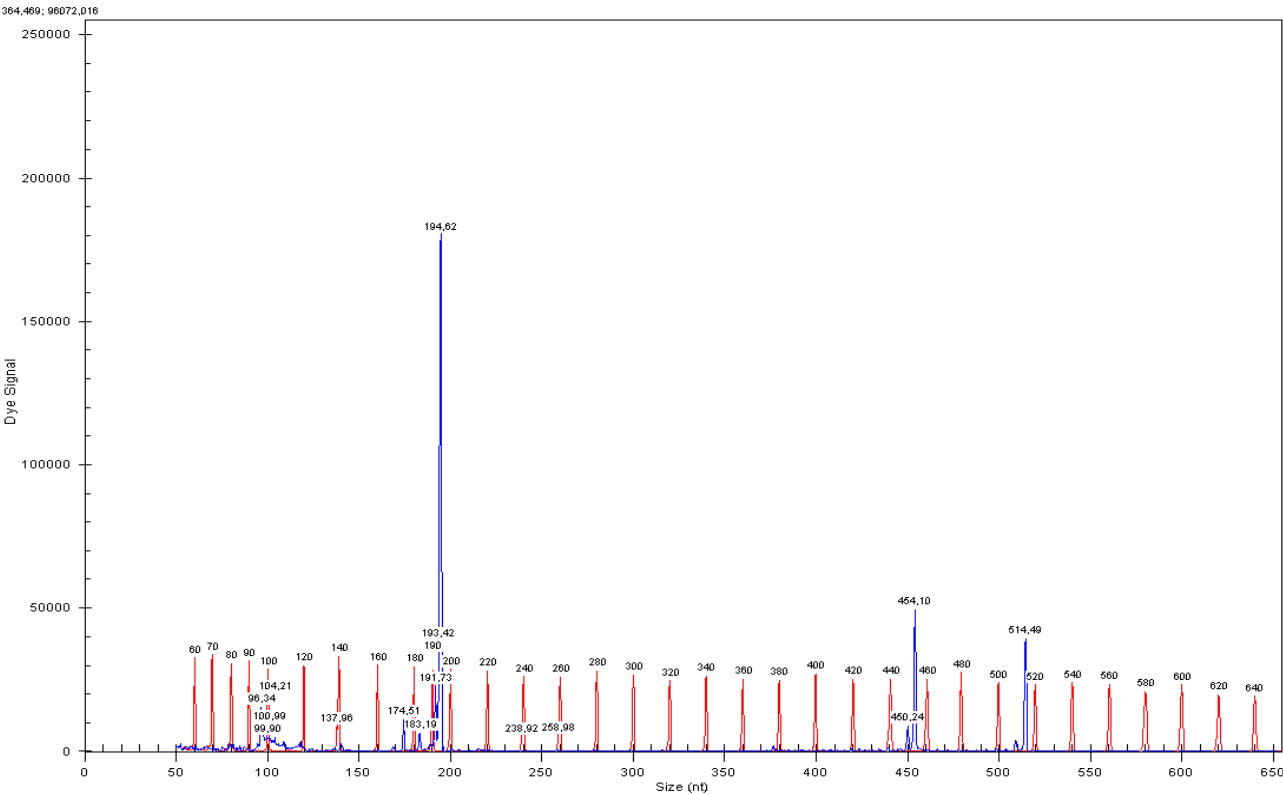

Fragment Sizes: 195bp, 454bp, 514bp

## Iran (Multiplex-PCR)

The only sample that did not perform well with capillary gel electrophoresis. Please refer to PAA gel electrophoresis as depicted in Fig 3 of the article.

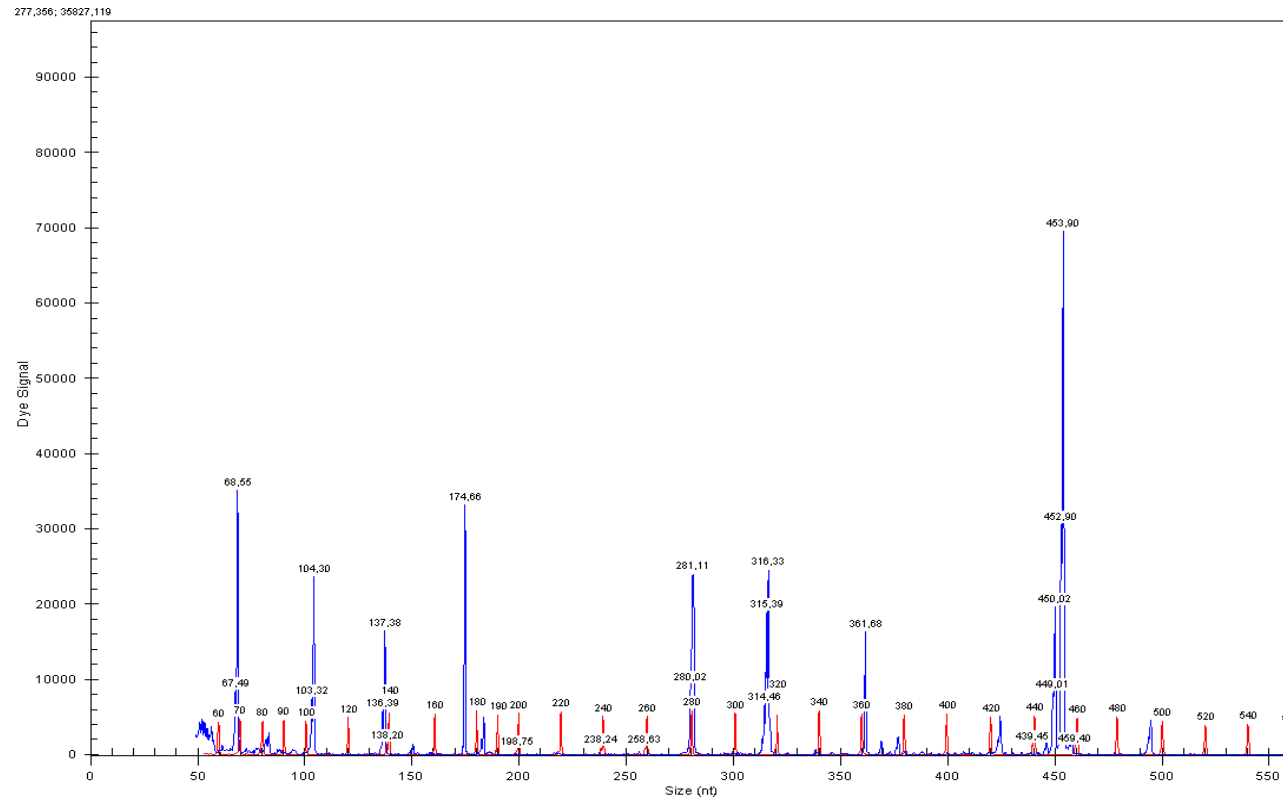

Fragment Sizes: 69bp, 104bp, 137bp, 175bp, 281bp, 316bp, 362bp, 454bp

As in PAA electrophoresis only fragment sizes at 175bp, 362bp und 454bp should appear. Also different template concentrations did not improve performance.

Papua Newguinea (Multiplex-PCR)

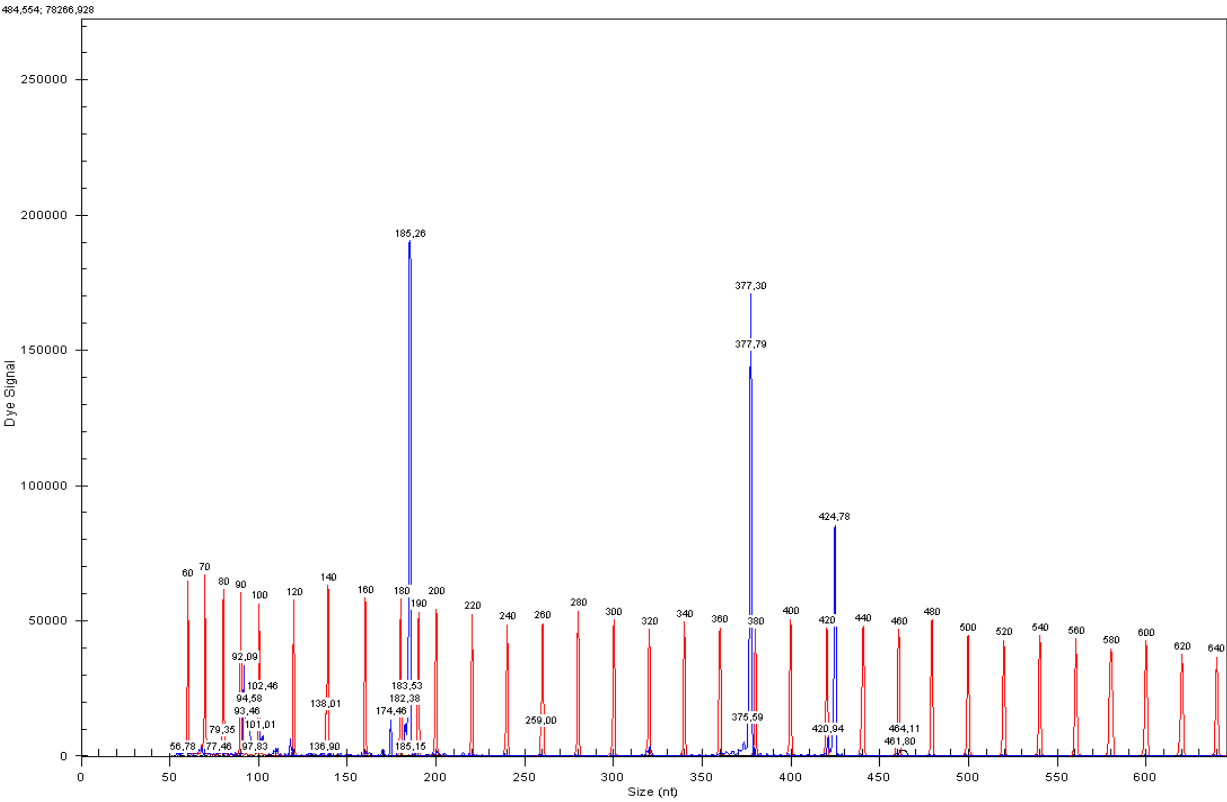

Ivory Coast (Multiplex-PCR)

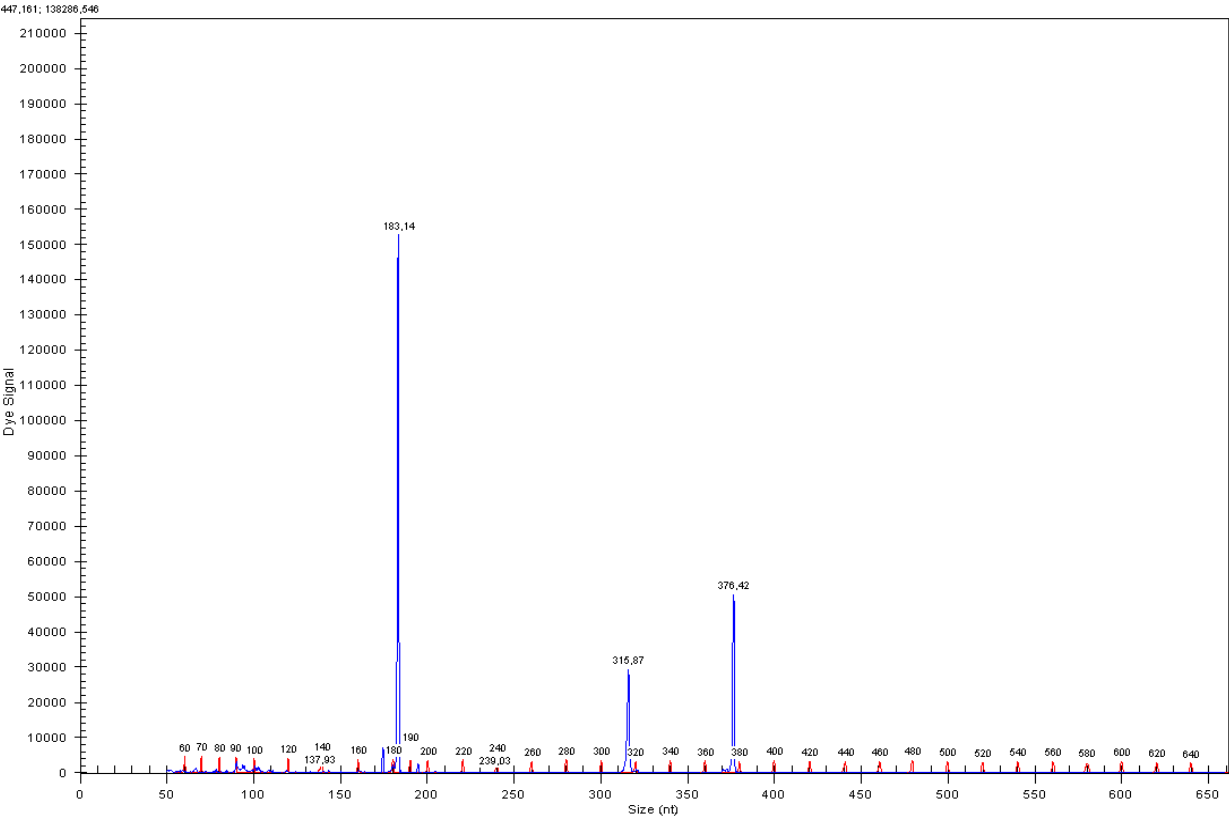

Fragment Sizes: 183bp, 316bp, 376bp

Maryland USA (Multiplex-PCR)

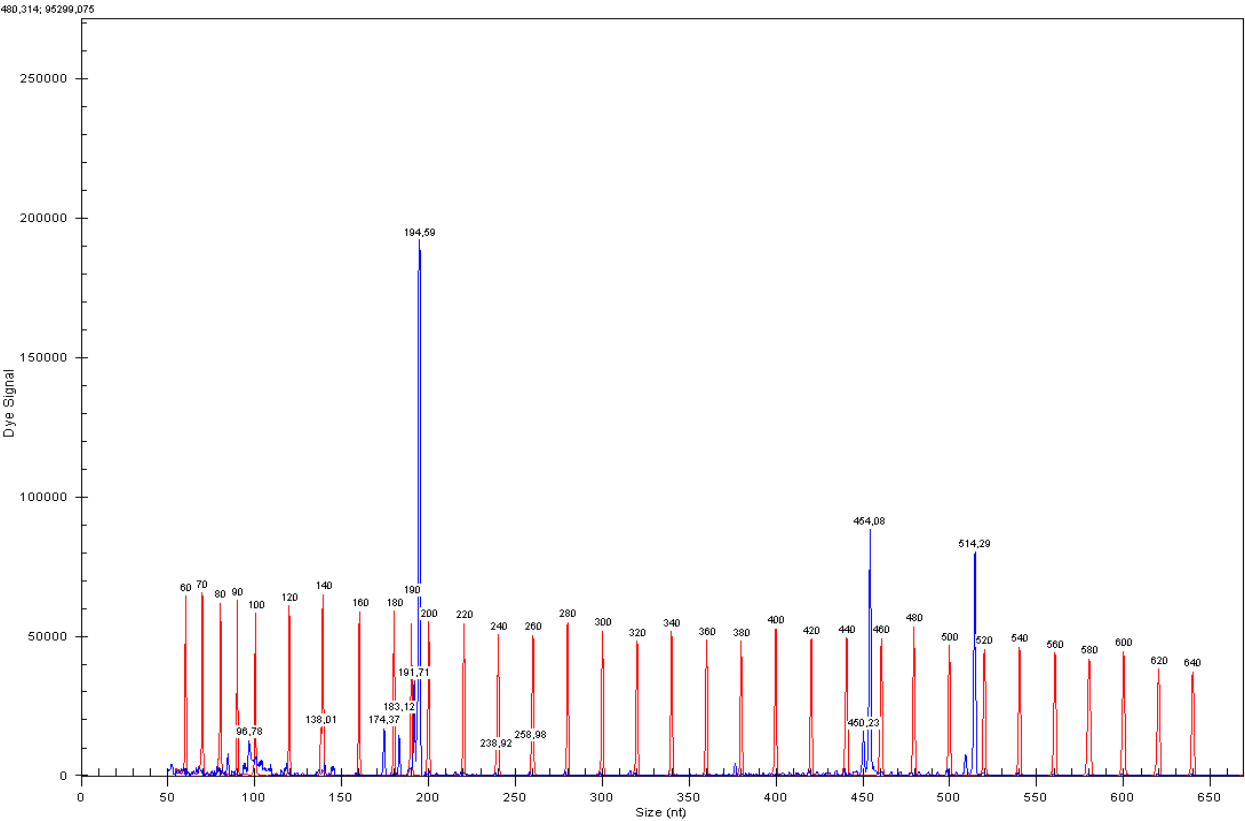

Fragment sizes: 195bp, 454bp, 514bp

Germany (Multiplex-PCR)

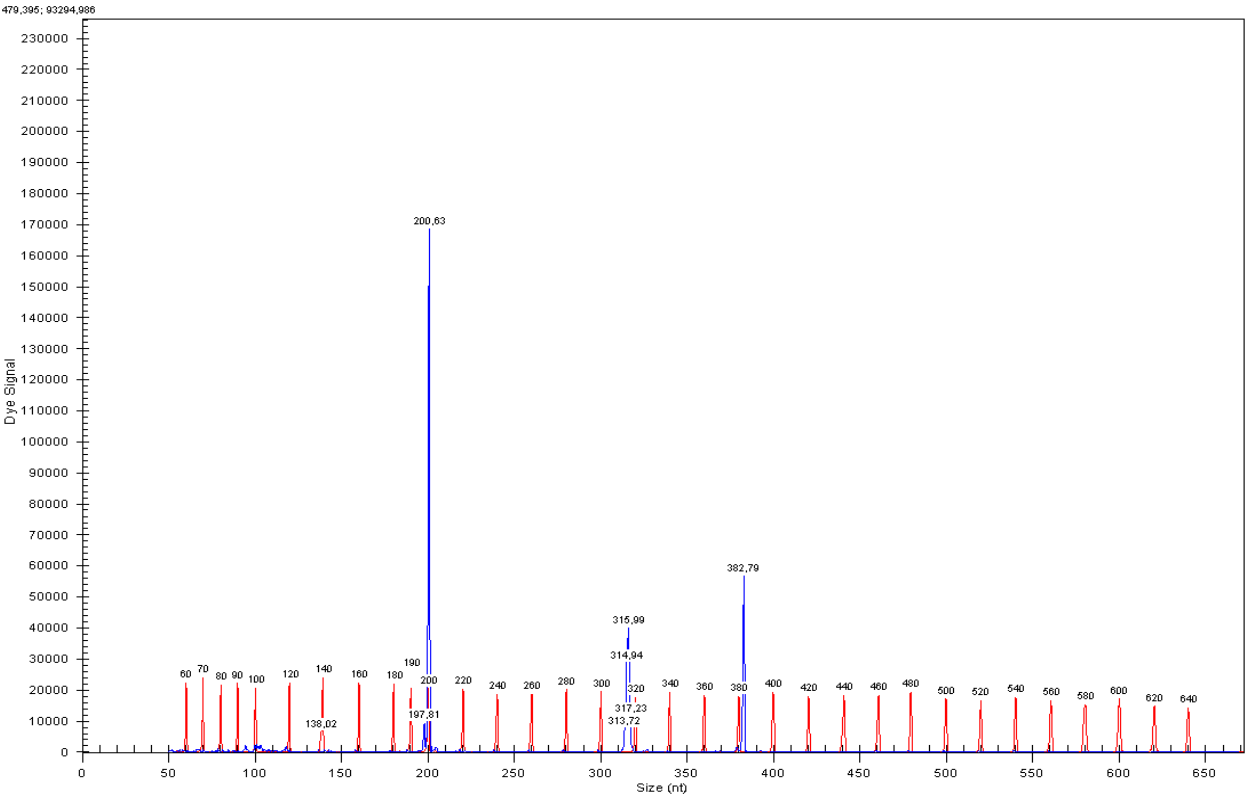

Fragment Sizes: 201bp, 316bp, 383bp

Netherlands (Multiplex-PCR)

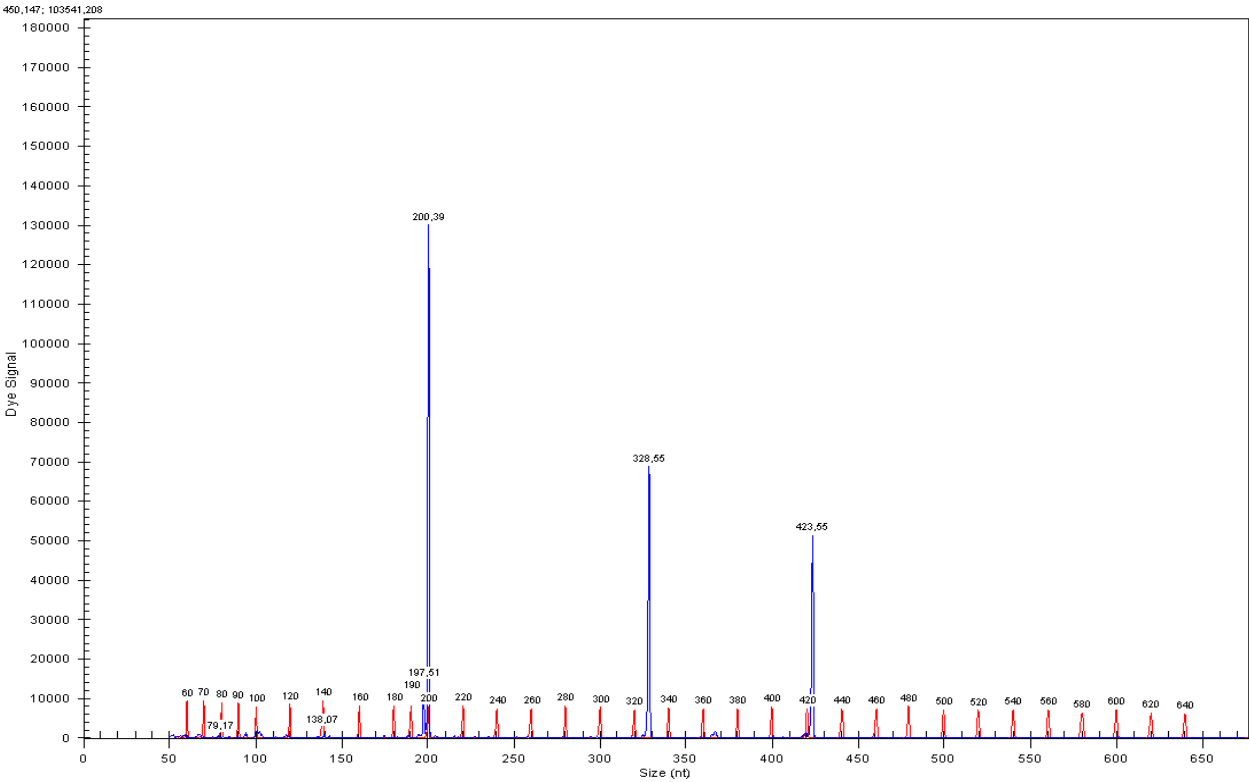

Fragment Sizes: 200bp, 329bp, 424bp



Guadeloupe (Multiplex-PCR)

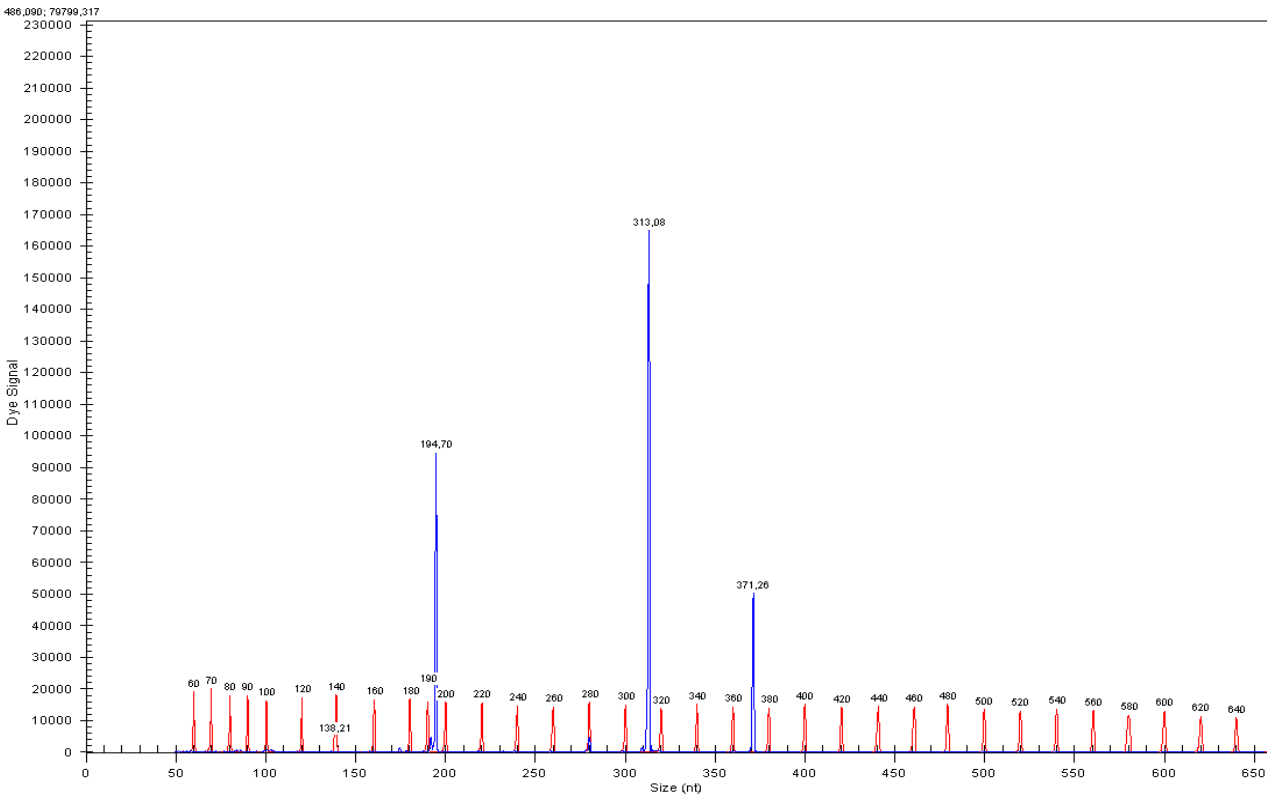

Fragment Sizes: 195bp, 313bp, 371bp

Moldova (Muiltplex-PCR)

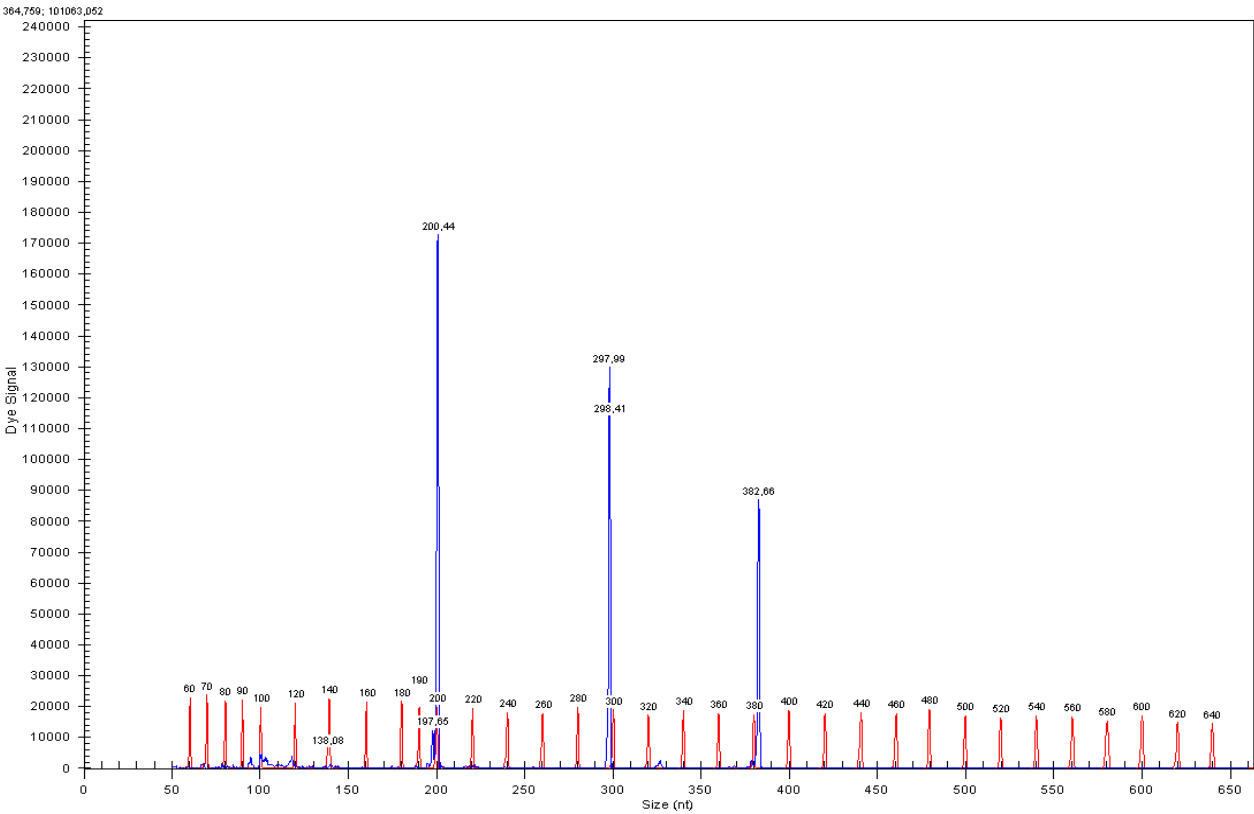

Fragment Sizes: 200bp, 298bp, 383bp
